# Supplementary material for: TRIP13/FLNA Complex Promotes Tumor Progression and Is Associated with Unfavorable Outcomes in Melanoma
Source: Hindawi journal article supplement (doi:10.1155/2022/1419179), 2022-10-11
Supplement: f1 [file 1419179.f1.pdf]

**A**

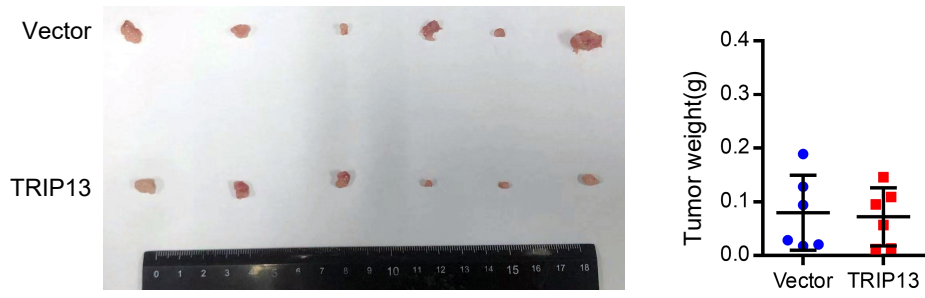

Figure 1. Overexpression of TRIP 13 doesn't influence the tumor growth in vivo. A
